# Supplementary material
Source: MDPI journal article supplement (https://www.mdpi.com/2227-9717/6/9/160)
Supplement: s1 [file s1]

# Supplementary Materials: Effect of the Length-to-Width Aspect Ratio of a Cuboid Packed-Bed Device on Efficiency of Chromatographic Separation

Guoqiang Chen and Raja Ghosh \*

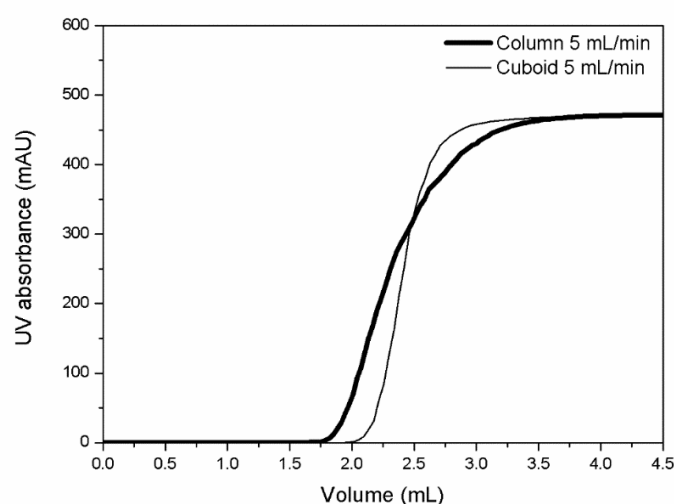

**Figure S1.** Unbound lysozyme break through curves obtained with the best cuboid packed-bed device and its equivalent column (media: Capto Q anion exchange, bed volume: 5 mL, buffer: 50 mM Tris-HCl, pH 8.0, sample: 1 mg/mL lysozyme, flow rate: 5 mL/min,  $v_s=150$  cm/h).

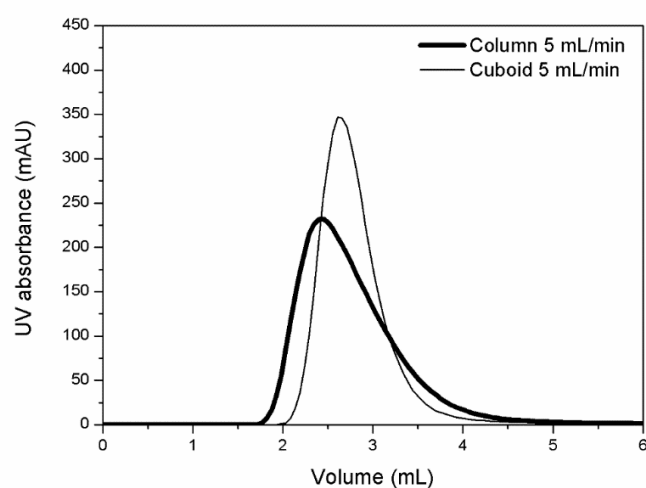

**Figure S2.** Lysozyme flow through peaks obtained with the best cuboid packed-bed device and its equivalent column (media: Capto Q anion exchange, bed volume: 5 mL, buffer: 50 mM Tris-HCl, pH 8.0, sample: 1 mg/mL lysozyme, loop: 0.5 mL, flow rate: 5 mL/min,  $v_s=150$  cm/h)

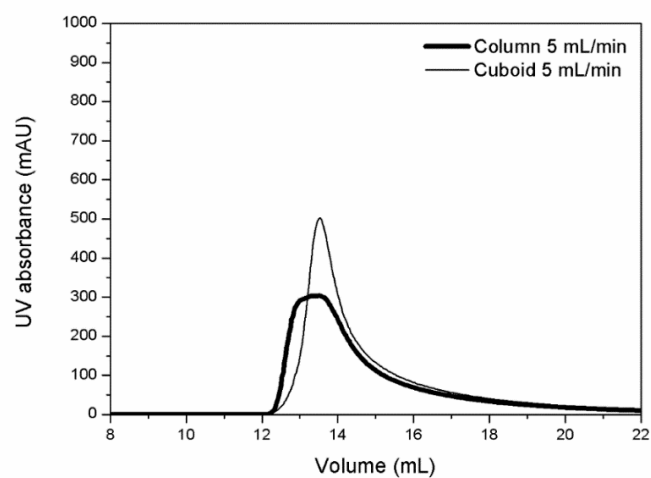

**Figure S3.** Eluted BSA peaks obtained with the best cuboid packed-bed device and its equivalent column (media: Capto Q anion exchange, bed volume: 5 mL, binding buffer: 50 mM Tris-HCl, pH 8.0, eluting buffer: 50 mM Tris-HCl, 1 M NaCl, pH 8.0, sample: 2 mg/mL BSA, loop: 5 mL, flow rate: 5 mL/min,  $v_s=150$  cm/h)

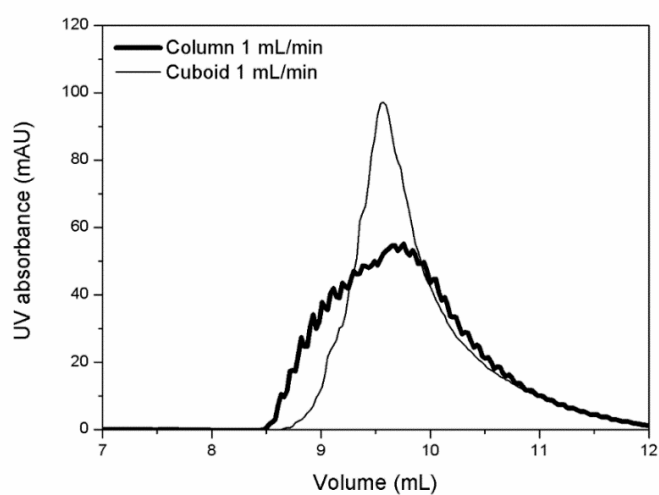

**Figure S4.** Eluted BSA peaks obtained with the best cuboid packed-bed device and its equivalent column (media: Capto Q anion exchange, bed volume: 5 mL, binding buffer: 50 mM Tris-HCl, pH 8.0, eluting buffer: 50 mM Tris-HCl, 1 M NaCl, pH 8.0, sample: 2 mg/mL BSA, loop: 0.5 mL, flow rate: 1 mL/min,  $v_s=30$  cm/h)

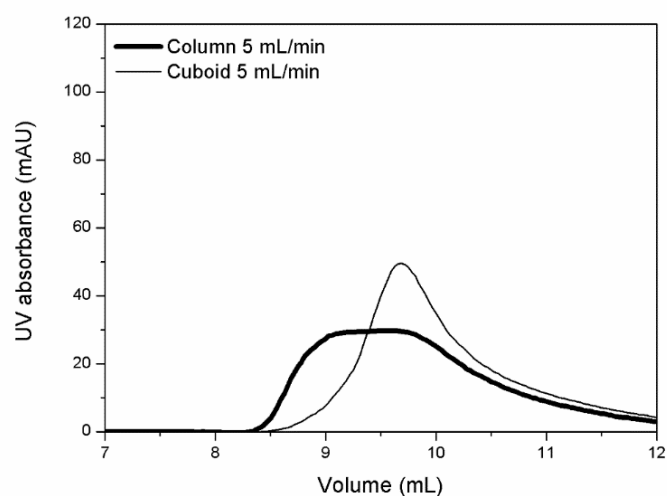

**Figure S5.** Eluted BSA peaks obtained with the best cuboid packed-bed device and its equivalent column (media: Capto Q anion exchange, bed volume: 5 mL, binding buffer: 50 mM Tris-HCl, pH 8.0, eluting buffer: 50 mM Tris-HCl, 1 M NaCl, pH 8.0, sample: 2 mg/mL BSA, loop: 0.5 mL, flow rate: 5 mL/min,  $v_s=150$  cm/h)

**Table S1.** Comparison of the attributes of the eluted BSA peaks obtained with the best cuboid packed-bed device and its equivalent column (media: Capto Q anion exchange, bed volume: 5 mL, binding buffer: 50 mM Tris-HCl, pH 8.0, eluting buffer: 50 mM Tris-HCl, 1 M NaCl, pH 8.0, sample: 2 mg/mL BSA,  $v_s=30$  and 150 cm/h for the flow rate of 1 and 5 mL/min respectively, injection volume: 5 mL)

| Flow rate<br>(mL/min) | Column                       |                              | Cuboid                       |                              |
|-----------------------|------------------------------|------------------------------|------------------------------|------------------------------|
|                       | Width at half height<br>(mL) | Apparent dispersion<br>index | Width at half height<br>(mL) | Apparent dispersion<br>index |
| 5                     | 1.94                         | 0.77                         | 1.02                         | 0.41                         |
| 1                     | 1.46                         | 0.58                         | 0.72                         | 0.29                         |
